# Supplementary material for: Integrative whole-genome and transcriptome analysis of HER2-amplified metastatic breast cancer
Source: Springer Nature journal article supplement (doi:10.1186/s13058-023-01743-z), 2023-11-15
Supplement: MOESM1 [file 26308212]

## Supplementary Figures and Tables

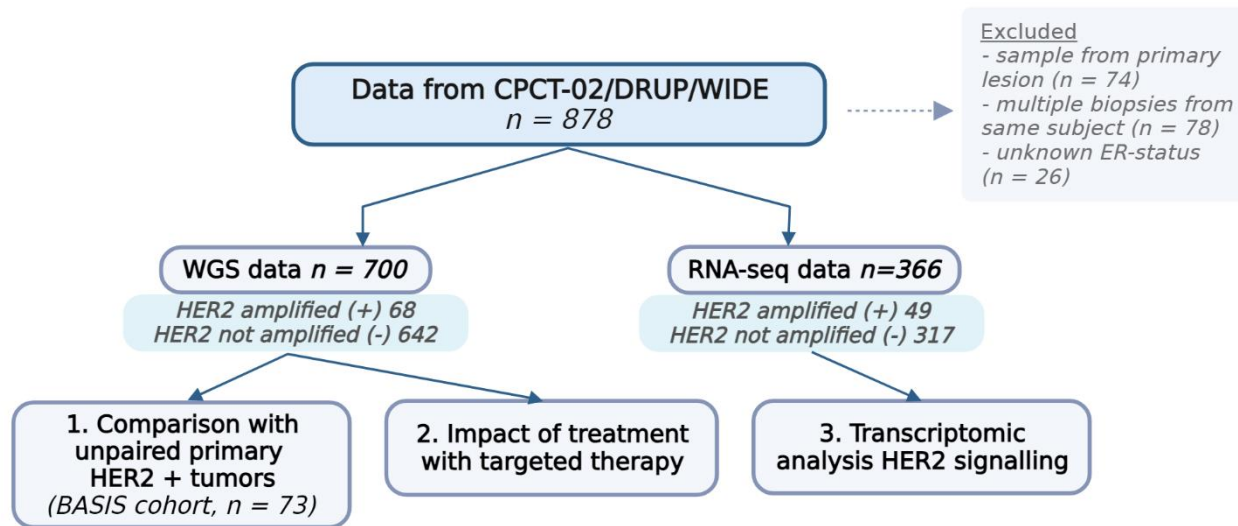

Supplementary Figure 1. Study workflow.

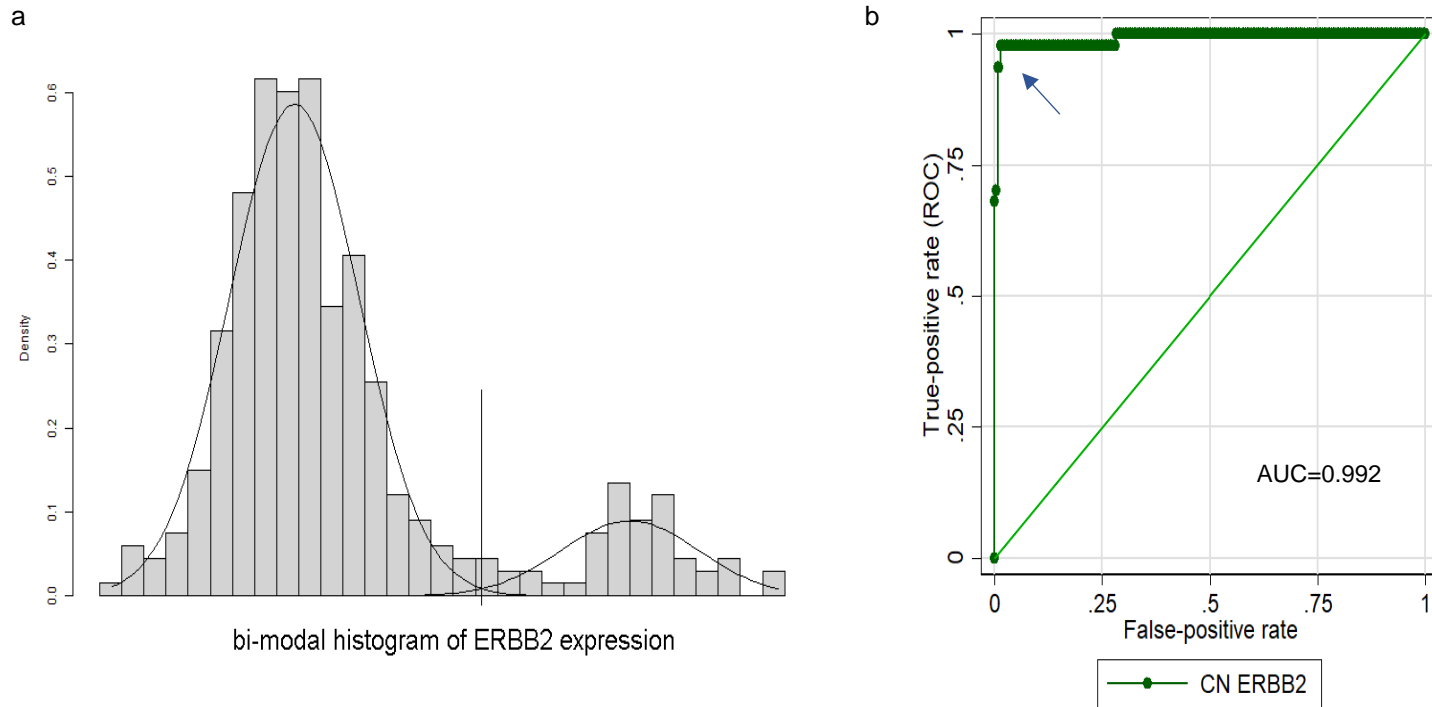

**Supplementary Figure 2. ERBB2 expression and copy number threshold.** a) ERBB2 expression shows a bi-modal distribution. The cross-point of the 2 normal estimation curves (vertical line) was used as threshold. b) ROC curve of ERBB2 CN, grouping samples by expression threshold. The arrow indicates the CN threshold of 9.954 (Youden index 0.965).

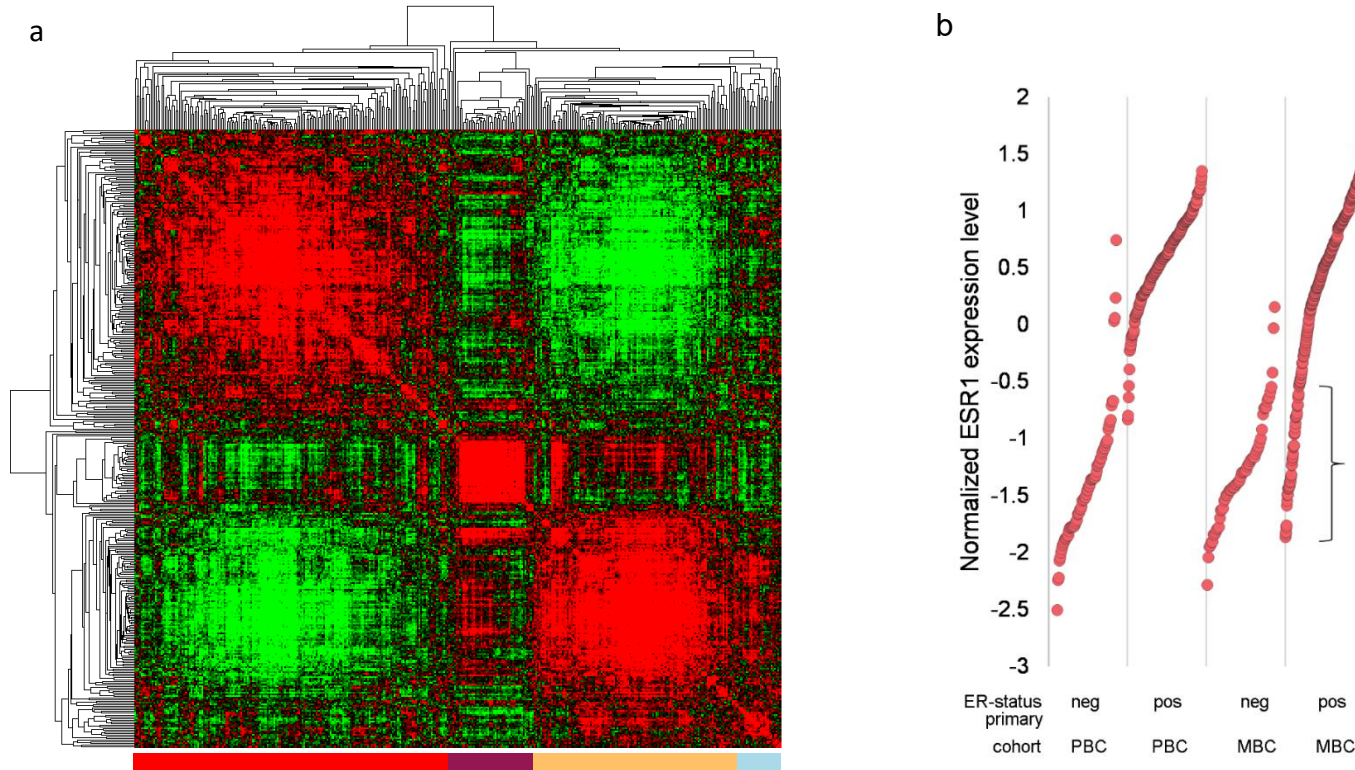

**Supplementary Figure 3. Hierarchical clustering correlation matrix of RNA sequencing data of the 366 MBC samples and *ESR1* expression over cohorts.** a) Hierarchical clustering correlation matrix. Expression levels of 878 genes associated with a HER2 driven expression profile were median centered and used to create a correlation matrix of sample vs sample. This matrix was subsequently used for hierarchical clustering, red and green indicating positive and negative correlation-coefficients, respectively. b) *ESR1* expression by ER-status of primary disease (via pathology reports) and BC groups. To obtain comparable levels, *ESR1* expression levels were z-normalized for PBC/MBC separately (i.e. both PBC and MBC distributions had a mean of 0 and standard deviation of 1). Bracket indicates overlapping area where ER positive cases (by status in primary disease) show expression levels comparable to ER negative cases.

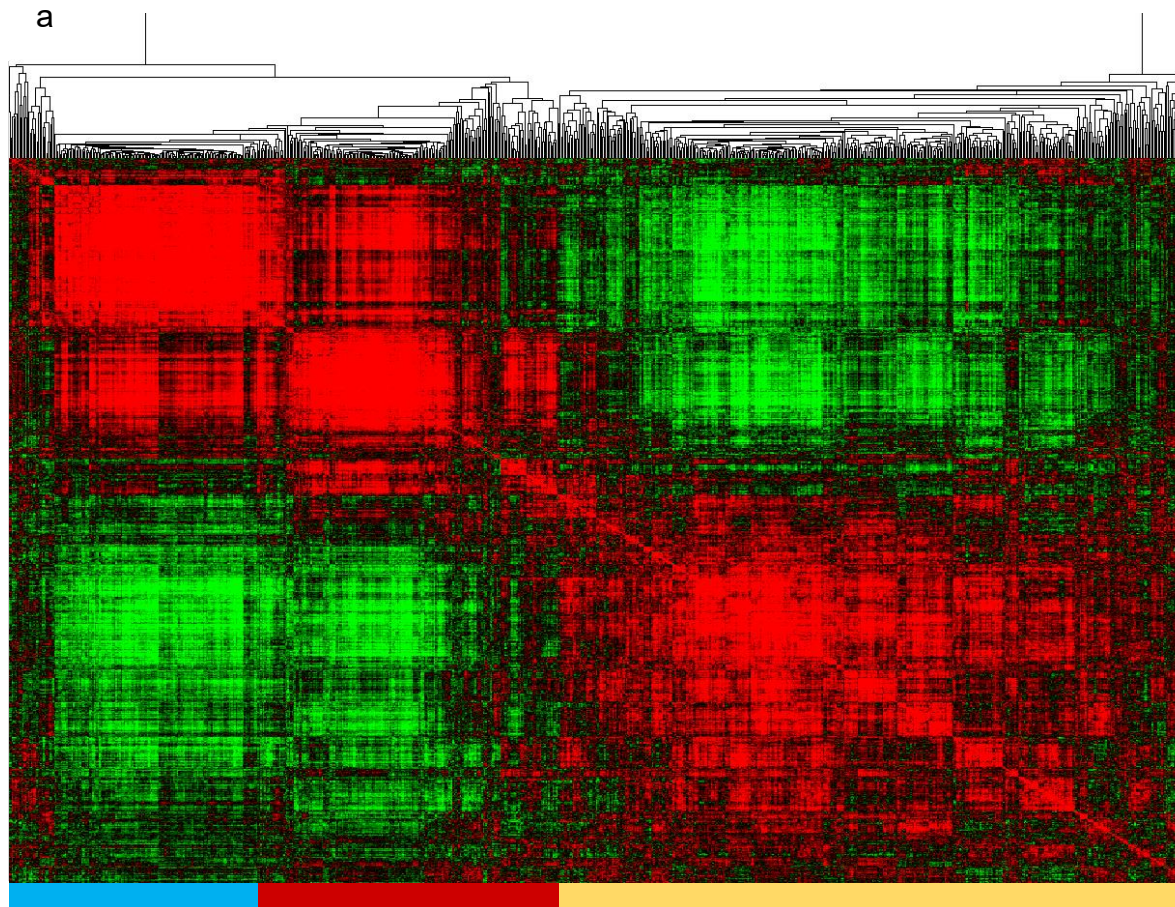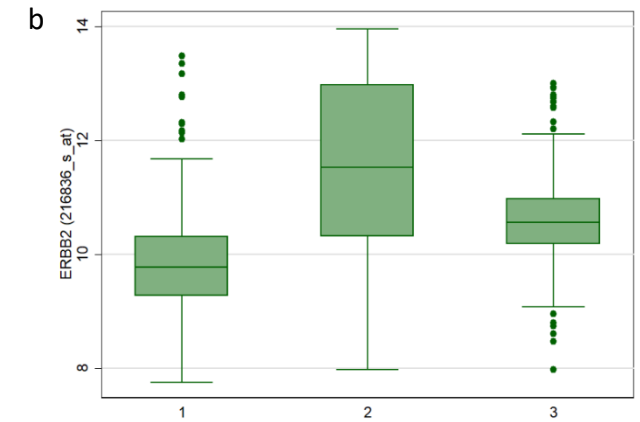

c

| Subtype      | cluster    |            |            | Total      |
|--------------|------------|------------|------------|------------|
|              | 1          | 2          | 3          |            |
| Basal        | 150        | 43         | 0          | 193        |
| Her2         | 6          | 102        | 4          | 112        |
| LumA         | 0          | 15         | 212        | 227        |
| LumB         | 4          | 22         | 117        | 143        |
| Normal       | 23         | 38         | 131        | 192        |
| <b>Total</b> | <b>183</b> | <b>220</b> | <b>464</b> | <b>867</b> |

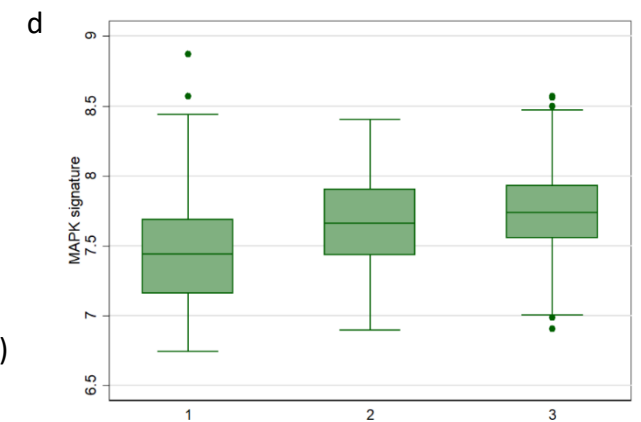

**Supplementary Figure 4. Hierarchical clustering correlation matrix independent public data of PBC.**

a) Expression levels of 878 genes associated with a HER2 driven expression profile were median centered to create a correlation matrix of sample vs sample. This matrix was subsequently used for hierarchical clustering, red and green indicating positive and negative correlation-coefficients, respectively. b) main clusters from (a) versus ERBB2 expression levels. c) versus molecular subtypes. d) versus average expression of MAPK signature genes.

a

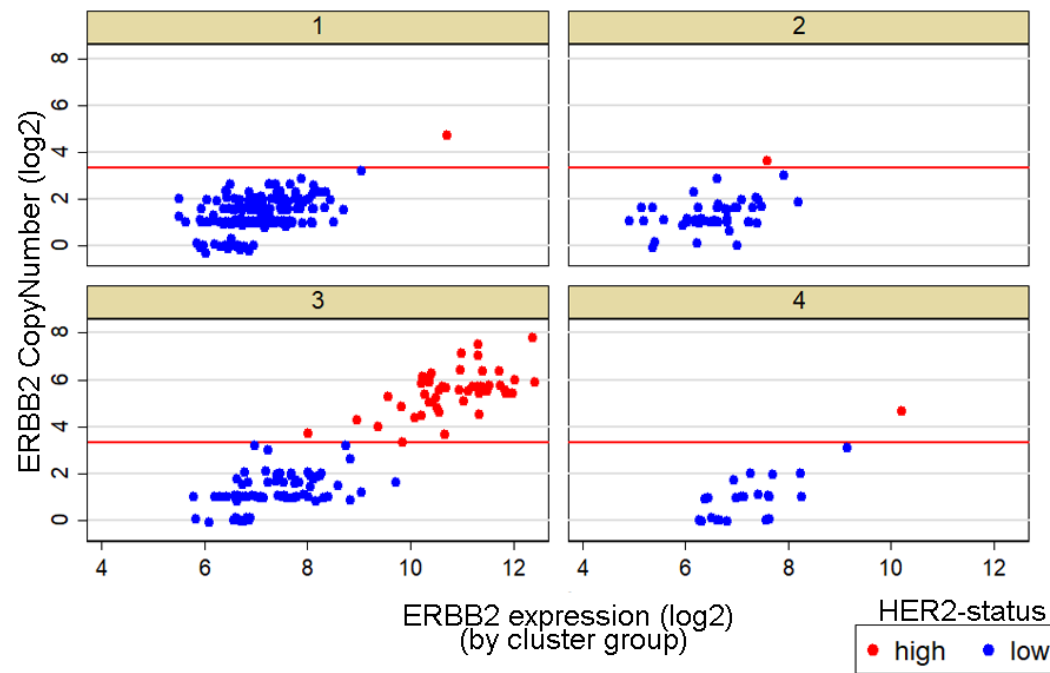

b

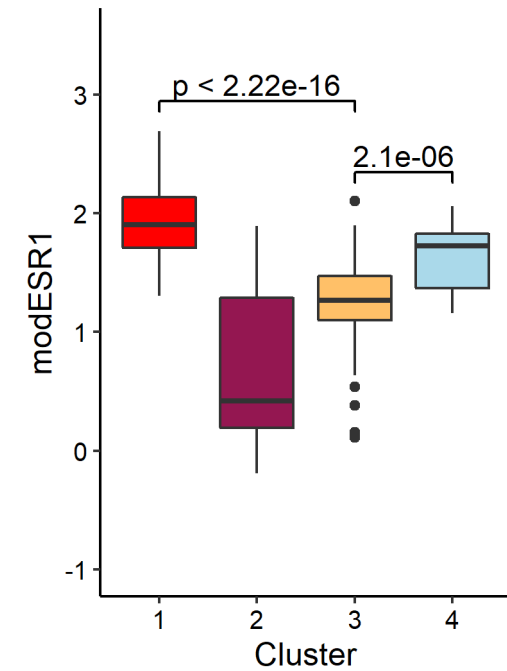

**Supplementary Figure 5. ERBB2 copy number and expression by cluster group and ESR1 pathway score by cluster group.** a) ERBB2 copy number (log2) and ERBB2 expression by cluster group. Red indicates HER2+ samples. b) ESR1 pathway expression by cluster group. The score on this module was significantly lower than in cluster 1 and 4, which also had a high frequency of ER-positive primary samples.

Supplementary Table 1: Univariable items tested for outcome on AHT

| <b>categorical</b>        | <b>remark</b>                                                     |
|---------------------------|-------------------------------------------------------------------|
| ER-Status                 | ER+ as group 1                                                    |
| HER2+ Status              | HER2+ as group 1                                                  |
| Nr of prior therapy lines | binary: 0 and 1 line as group 0                                   |
| TMB_10_5                  | TMB grouped 0-5,5-10,>10                                          |
| Whole Genome Duplication  | yes/no                                                            |
| Chromotrypsis             | yes/no                                                            |
| PIK3CA                    | mutation yes/no                                                   |
| ERBB2                     | mutation yes/no                                                   |
| domain                    | mutation ERBB2 by domain (Extracellular / Tyrosine Kinase Domain) |
| penp                      | combination of PIK3CA, ERBB2, NF1, PTEN                           |
| TP53                      | mutation yes/no                                                   |
| PIK3CA                    | mutation yes/no                                                   |
| MUC16                     | mutation yes/no                                                   |
| HMCN1                     | mutation yes/no                                                   |
| RYR2                      | mutation yes/no                                                   |
| USH2A                     | mutation yes/no                                                   |
| HYDIN                     | mutation yes/no                                                   |
| CDK12                     | mutation yes/no                                                   |
| OBSCN                     | mutation yes/no                                                   |
| ABCA13                    | mutation yes/no                                                   |
| CACNA1G                   | mutation yes/no                                                   |
| CSMD1                     | mutation yes/no                                                   |
| PKHD1L1                   | mutation yes/no                                                   |
| RYR1                      | mutation yes/no                                                   |
| SYNE2                     | mutation yes/no                                                   |
| ATR                       | mutation yes/no                                                   |
| CSMD3                     | mutation yes/no                                                   |

| <b>categorical</b> | <b>remark</b>        |
|--------------------|----------------------|
| LRP1B              | mutation yes/no      |
| MED1               | mutation yes/no      |
| PLEC               | mutation yes/no      |
| VPS13B             | mutation yes/no      |
| ZFHX4              | mutation yes/no      |
| Amp1               | Gistic region yes/no |
| Amp2               | Gistic region yes/no |
| Amp3               | Gistic region yes/no |
| Amp4               | Gistic region yes/no |
| Amp5               | Gistic region yes/no |
| Amp6               | Gistic region yes/no |
| Amp7               | Gistic region yes/no |
| Amp8               | Gistic region yes/no |
| Amp9               | Gistic region yes/no |
| Amp10              | Gistic region yes/no |
| Amp11              | Gistic region yes/no |
| Amp12              | Gistic region yes/no |
| Amp13              | Gistic region yes/no |
| Amp14              | Gistic region yes/no |
| Amp15              | Gistic region yes/no |
| Amp16              | Gistic region yes/no |
| Del17              | Gistic region yes/no |
| Del18              | Gistic region yes/no |
| Del20              | Gistic region yes/no |
| Del31              | Gistic region yes/no |



| <b>continuous</b>         | <b>remark</b>                                       |
|---------------------------|-----------------------------------------------------|
| Nr of prior therapy lines |                                                     |
| Muts.InDel                | nr of somatic Insertion/Deletions                   |
| Muts.MNV                  | nr of somatic multinucleotide substitutions         |
| Muts.SNV                  | nr of somatic singlenucleotide substitutions        |
| TMB                       |                                                     |
| SV.DEL                    | nr of structural variant of type deletion           |
| SV.DUP                    | nr of structural variant of type tandem duplication |
| SV.INV                    | nr of structural variant of type inversion          |
| SV.SINGLE                 | nr of structural variant of type single             |
| SV.TRA                    | nr of structural variant of type translocation      |
| totalSV                   | total nr of SVs                                     |
| genomePloidy              |                                                     |
| SBS1                      | % contribution                                      |
| SBS2                      | % contribution                                      |
| SBS3                      | % contribution                                      |
| SBS5                      | % contribution                                      |
| SBS8                      | % contribution                                      |
| SBS13                     | % contribution                                      |
| SBS18                     | % contribution                                      |
| SBS39                     | % contribution                                      |
| SBS40                     | % contribution                                      |
| DBS2                      | % contribution                                      |
| DBS3                      | % contribution                                      |
| DBS4                      | % contribution                                      |
| DBS5                      | % contribution                                      |
| DBS6                      | % contribution                                      |
| DBS7                      | % contribution                                      |
| DBS9                      | % contribution                                      |
| DBS11                     | % contribution                                      |

| <b>continuous</b> | <b>remark</b>                    |
|-------------------|----------------------------------|
| ID1               | % contribution                   |
| ID2               | % contribution                   |
| ID3               | % contribution                   |
| ID4               | % contribution                   |
| ID5               | % contribution                   |
| ID6               | % contribution                   |
| ID8               | % contribution                   |
| ID9               | % contribution                   |
| ID10              | % contribution                   |
| SV2               | % contribution                   |
| SV4               | % contribution                   |
| SV5               | % contribution                   |
| SV6               | % contribution                   |
| nr_GISTIC2        | Number of CNV regions via GISTIC |

Supplementary Table 2: HER2-specific genes

| <b>ENSG</b>     | <b>NAME</b> | <b>ENSG</b>     | <b>NAME</b> | <b>ENSG</b>     | <b>NAME</b> |
|-----------------|-------------|-----------------|-------------|-----------------|-------------|
| ENSG00000178372 | CALML5      | ENSG00000187634 | SAMD11      | ENSG00000117115 | PADI2       |
| ENSG00000176887 | SOX11       | ENSG00000229453 | SPINK8      | ENSG00000118514 | ALDH8A1     |
| ENSG00000198729 | PPP1R14C    | ENSG00000213420 | GPC2        | ENSG00000135472 | FAIM2       |
| ENSG00000198535 | C2CD4A      | ENSG00000131015 | ULBP2       | ENSG00000120875 | DUSP4       |
| ENSG00000172551 | MUCL1       | ENSG00000115850 | LCT         | ENSG00000159166 | LAD1        |
| ENSG00000165125 | TRPV6       | ENSG00000101846 | STS         | ENSG00000230601 | TEX48       |
| ENSG00000172478 | MAB21L4     | ENSG00000189377 | CXCL17      | ENSG00000058335 | RASGRF1     |
| ENSG00000163220 | S100A9      | ENSG00000102970 | CCL17       | ENSG00000081148 | IMPG2       |
| ENSG00000134323 | MYCN        | ENSG00000249961 | TERB1       | ENSG00000125898 | FAM110A     |
| ENSG00000143546 | S100A8      | ENSG00000130675 | MNX1        | ENSG00000258947 | TUBB3       |
| ENSG00000179913 | B3GNT3      | ENSG00000203985 | LDLRAD1     | ENSG00000101333 | PLCB4       |
| ENSG00000137648 | TMPRSS4     | ENSG00000182782 | HCAR2       | ENSG00000104941 | RSPH6A      |
| ENSG00000163362 | INAVA       | ENSG00000133962 | CATSPERB    | ENSG00000188483 | IER5L       |
| ENSG00000115221 | ITGB6       | ENSG00000132746 | ALDH3B2     | ENSG00000088305 | DNMT3B      |
| ENSG00000158089 | GALNT14     | ENSG00000081985 | IL12RB2     | ENSG00000183496 | MEX3B       |
| ENSG00000107242 | PIP5K1B     | ENSG00000143512 | HHIPL2      | ENSG00000071575 | TRIB2       |
| ENSG00000261115 | TMEM178B    | ENSG00000162949 | CAPN13      | ENSG00000006118 | TMEM132A    |
| ENSG00000105523 | FAM83E      | ENSG00000135698 | MPHOSPH6    | ENSG00000140832 | MARVELD3    |
| ENSG00000069812 | HES2        | ENSG00000088836 | SLC4A11     | ENSG00000163993 | S100P       |
| ENSG00000177202 | SPACA4      | ENSG00000088726 | TMEM40      | ENSG00000184343 | SRPK3       |
| ENSG00000166268 | MYRFL       | ENSG00000128165 | ADM2        | ENSG00000170684 | ZNF296      |
| ENSG00000127249 | ATP13A4     | ENSG00000099994 | SUSD2       | ENSG00000223573 | TINCR       |
| ENSG00000137975 | CLCA2       | ENSG00000148377 | IDI2        | ENSG00000165202 | OR1Q1       |
| ENSG00000205502 | C2CD4B      | ENSG00000102387 | TAF7L       | ENSG00000171208 | NETO2       |
| ENSG00000120471 | TP53AIP1    | ENSG00000135480 | KRT7        | ENSG00000151117 | TMEM86A     |
| ENSG00000168389 | MFSD2A      | ENSG00000182308 | DCAF4L1     | ENSG00000140798 | ABCC12      |
| ENSG00000131019 | ULBP3       | ENSG00000103089 | FA2H        | ENSG00000160867 | FGFR4       |

| <b>ENSG</b>     | <b>NAME</b> |
|-----------------|-------------|
| ENSG0000063127  | SLC6A16     |
| ENSG00000184709 | LRRC26      |
| ENSG00000185863 | TMEM210     |
| ENSG00000086548 | CEACAM6     |
| ENSG00000148215 | OR5C1       |
| ENSG00000181649 | PHLDA2      |
| ENSG00000188959 | C9orf152    |
| ENSG00000135248 | FAM71F1     |
| ENSG00000248099 | INSL3       |
| ENSG00000106077 | ABHD11      |
| ENSG00000186193 | SAPCD2      |
| ENSG00000179057 | IGSF22      |
| ENSG00000181019 | NQO1        |
| ENSG00000105088 | OLFM2       |
| ENSG00000187566 | NHLRC1      |
| ENSG00000117009 | KMO         |
| ENSG00000197119 | SLC25A29    |
| ENSG00000100031 | GGT1        |
| ENSG00000157613 | CREB3L1     |
| ENSG00000188322 | SBK1        |
| ENSG00000161911 | TREML1      |
| ENSG00000111981 | ULBP1       |
| ENSG00000166866 | MYO1A       |
| ENSG00000104894 | CD37        |
| ENSG00000189030 | VHLL        |
| ENSG00000078804 | TP53INP2    |
| ENSG00000100290 | BIK         |
| ENSG00000151715 | TMEM45B     |

| <b>ENSG</b>     | <b>NAME</b> |
|-----------------|-------------|
| ENSG00000169583 | CLIC3       |
| ENSG00000182902 | SLC25A18    |
| ENSG00000131379 | C3orf20     |
| ENSG00000130783 | CCDC62      |
| ENSG00000149506 | ZP1         |
| ENSG00000110400 | NECTIN1     |
| ENSG00000230054 | TEX53       |
| ENSG00000116703 | PDC         |
| ENSG00000115339 | GALNT3      |
| ENSG00000118557 | PMFBP1      |
| ENSG00000160211 | G6PD        |
| ENSG00000212747 | RTL8B       |
| ENSG00000115884 | SDC1        |
| ENSG00000003249 | DBNDD1      |
| ENSG00000241484 | ARHGAP8     |
| ENSG00000103067 | ESRP2       |
| ENSG00000134909 | ARHGAP32    |
| ENSG00000198807 | PAX9        |
| ENSG00000146386 | ABRACL      |
| ENSG00000198753 | PLXNB3      |
| ENSG00000167800 | TBX10       |
| ENSG00000196639 | HRH1        |
| ENSG00000184635 | ZNF93       |
| ENSG00000135269 | TES         |
| ENSG00000198363 | ASPH        |
| ENSG00000197070 | ARRDC1      |
| ENSG00000130164 | LDLR        |
| ENSG00000197506 | SLC28A3     |

| <b>ENSG</b>     | <b>NAME</b> |
|-----------------|-------------|
| ENSG00000121270 | ABCC11      |
| ENSG00000135750 | KCNK1       |
| ENSG00000205426 | KRT81       |
| ENSG00000106789 | CORO2A      |
| ENSG00000181588 | MEX3D       |
| ENSG00000203485 | INF2        |
| ENSG00000253309 | SERPINE3    |
| ENSG00000198369 | SPRED2      |
| ENSG00000102554 | KLF5        |
| ENSG00000181016 | LSMEM1      |
| ENSG00000102996 | MMP15       |
| ENSG00000181090 | EHMT1       |
| ENSG00000171219 | CDC42BPG    |
| ENSG00000131037 | EPS8L1      |
| ENSG00000170537 | TMC7        |
| ENSG00000185674 | LYG2        |
|                 | PRR5-       |
| ENSG00000248405 | ARHGAP8     |
| ENSG00000147689 | FAM83A      |
| ENSG00000111644 | ACRBP       |
| ENSG00000051620 | HEBP2       |
| ENSG00000261609 | GAN         |
| ENSG00000144214 | LYG1        |
| ENSG00000188050 | RNF133      |
| ENSG00000196781 | TLE1        |
| ENSG00000135245 | HILPDA      |
| ENSG00000139988 | RDH12       |
| ENSG00000172183 | ISG20       |
| ENSG00000188643 | S100A16     |

| <b>ENSG</b>     | <b>NAME</b> |
|-----------------|-------------|
| ENSG00000112599 | GUCA1B      |
| ENSG00000139318 | DUSP6       |
| ENSG00000178026 | LRRC75B     |
| ENSG00000069399 | BCL3        |
| ENSG00000272398 | CD24        |
| ENSG00000135643 | KCNMB4      |
| ENSG00000177025 | C19orf18    |
| ENSG00000125257 | ABCC4       |
| ENSG00000183421 | RIPK4       |
| ENSG00000124664 | SPDEF       |
| ENSG00000165555 | NOXRED1     |
| ENSG00000184828 | ZBTB7C      |
| ENSG00000156966 | B3GNT7      |
| ENSG00000168528 | SERINC2     |
| ENSG00000064547 | LPAR2       |
| ENSG00000099889 | ARVCF       |
| ENSG00000162639 | HENMT1      |
| ENSG00000258429 | PDF         |
| ENSG00000171786 | NHLH1       |
| ENSG00000196411 | EPHB4       |
| ENSG00000138074 | SLC5A6      |
| ENSG00000071564 | TCF3        |
| ENSG00000143061 | IGSF3       |
| ENSG00000164049 | FBXW12      |
| ENSG00000183762 | KREMEN1     |
| ENSG00000102984 | ZNF821      |
| ENSG00000196338 | NLGN3       |
| ENSG00000104881 | PPP1R13L    |
| ENSG00000197442 | MAP3K5      |

| <b>ENSG</b>     | <b>NAME</b> |
|-----------------|-------------|
| ENSG00000197496 | SLC2A10     |
| ENSG00000173261 | PLAC8L1     |
| ENSG00000240038 | AMY2B       |
| ENSG00000103460 | TOX3        |
| ENSG00000169758 | TMEM266     |
| ENSG00000145555 | MYO10       |
| ENSG00000143013 | LMO4        |
| ENSG00000102385 | DRP2        |
| ENSG00000130529 | TRPM4       |
| ENSG00000178409 | BEND3       |
| ENSG00000239264 | TXNDC5      |
| ENSG00000240849 | PEDS1       |
| ENSG00000172780 | RAB43       |
| ENSG00000136295 | TTYH3       |
| ENSG00000114315 | HES1        |
| ENSG00000106089 | STX1A       |
| ENSG00000176973 | FAM89B      |
| ENSG00000164638 | SLC29A4     |
| ENSG00000175567 | UCP2        |
| ENSG00000183963 | SMTN        |
| ENSG00000133422 | MORC2       |
| ENSG00000167508 | MVD         |
| ENSG00000198911 | SREBF2      |
| ENSG00000074416 | MGLL        |
| ENSG00000113758 | DBN1        |
| ENSG00000125895 | TMEM74B     |
| ENSG00000155714 | PDZD9       |
| ENSG00000143507 | DUSP10      |
| ENSG00000169925 | BRD3        |

| <b>ENSG</b>     | <b>NAME</b> |
|-----------------|-------------|
| ENSG00000149782 | PLCB3       |
| ENSG00000203950 | RTL8A       |
| ENSG00000134317 | GRHL1       |
| ENSG00000064270 | ATP2C2      |
| ENSG00000101255 | TRIB3       |
| ENSG00000106003 | LFNG        |
| ENSG00000184731 | FAM110C     |
| ENSG00000135540 | NHSL1       |
| ENSG00000146072 | TNFRSF21    |
| ENSG00000077044 | DGKD        |
| ENSG00000102898 | NUTF2       |
| ENSG00000075218 | GTSE1       |
| ENSG00000124766 | SOX4        |
| ENSG00000006432 | MAP3K9      |
| ENSG00000080845 | DLGAP4      |
| ENSG00000185340 | GAS2L1      |
| ENSG00000125247 | TMTC4       |
| ENSG00000100359 | SGSM3       |
| ENSG00000119772 | DNMT3A      |
| ENSG00000186187 | ZNRF1       |
| ENSG00000112242 | E2F3        |
| ENSG00000104866 | PPP1R37     |
| ENSG00000275183 | LENG9       |
| ENSG00000078237 | TIGAR       |
| ENSG00000118263 | KLF7        |
| ENSG00000168140 | VASN        |
| ENSG00000010818 | HIVEP2      |
| ENSG00000112787 | FBRSL1      |
| ENSG00000051128 | HOMER3      |

| <b>ENSG</b>     | <b>NAME</b> |
|-----------------|-------------|
| ENSG00000160190 | SLC37A1     |
| ENSG00000107130 | NCS1        |
| ENSG00000130881 | LRP3        |
| ENSG00000160439 | RDH13       |
| ENSG00000167535 | CACNB3      |
| ENSG00000131149 | GSE1        |
| ENSG00000112655 | PTK7        |
| ENSG00000173457 | PPP1R14B    |
| ENSG00000143995 | MEIS1       |
| ENSG00000100266 | PACSIN2     |
| ENSG00000204569 | PPP1R10     |
| ENSG00000140374 | ETFA        |
| ENSG00000188486 | H2AX        |
| ENSG00000184545 | DUSP8       |
| ENSG00000126214 | KLC1        |
| ENSG00000254986 | DPP3        |
| ENSG00000126458 | RRAS        |
| ENSG00000165389 | SPTSSA      |
| ENSG00000167470 | MIDN        |
| ENSG00000146904 | EPHA1       |
| ENSG00000139722 | VPS37B      |
| ENSG00000160883 | HK3         |
| ENSG00000175274 | TP53I11     |
| ENSG00000148396 | SEC16A      |
| ENSG00000165724 | ZMYND19     |
| ENSG00000196526 | AFAP1       |
| ENSG00000136830 | NIBAN2      |
| ENSG00000106799 | TGFBR1      |
| ENSG00000187678 | SPRY4       |

| <b>ENSG</b>     | <b>NAME</b> |
|-----------------|-------------|
| ENSG00000149418 | ST14        |
| ENSG00000196576 | PLXNB2      |
| ENSG00000196123 | KIAA0895L   |
| ENSG00000147144 | CCDC120     |
| ENSG00000011422 | PLAUR       |
| ENSG00000177169 | ULK1        |
| ENSG00000125772 | GPCPD1      |
| ENSG00000109625 | CPZ         |
| ENSG00000215529 | EFCAB8      |
| ENSG00000189306 | RRP7A       |
| ENSG00000119514 | GALNT12     |
| ENSG00000139832 | RAB20       |
| ENSG00000103248 | MTHFSD      |
| ENSG00000165684 | SNAPC4      |
| ENSG00000277443 | MARCKS      |
| ENSG00000110047 | EHD1        |
| ENSG00000146410 | MTFR2       |
| ENSG00000131165 | CHMP1A      |
| ENSG00000147166 | ITGB1BP2    |
| ENSG00000100403 | ZC3H7B      |
| ENSG00000133818 | RRAS2       |
| ENSG00000102390 | PBDC1       |
| ENSG00000135723 | FHOD1       |
| ENSG00000133275 | CSNK1G2     |
| ENSG00000130669 | PAK4        |
| ENSG00000114423 | CBLB        |
| ENSG00000205078 | SYCE1L      |
| ENSG00000095383 | TBC1D2      |
| ENSG00000103005 | USB1        |

| <b>ENSG</b>     | <b>NAME</b> |
|-----------------|-------------|
| ENSG00000198792 | TMEM184B    |
| ENSG00000254440 | PBOV1       |
| ENSG00000151883 | PARP8       |
| ENSG00000167523 | SPATA33     |
| ENSG00000102349 | KLF8        |
| ENSG00000140848 | CPNE2       |
| ENSG00000102871 | TRADD       |
| ENSG00000131061 | ZNF341      |
| ENSG00000092820 | EZR         |
| ENSG00000081803 | CADPS2      |
| ENSG00000188290 | HES4        |
| ENSG00000100075 | SLC25A1     |
| ENSG00000134590 | RTL8C       |
| ENSG00000093010 | COMT        |
| ENSG00000005238 | FAM214B     |
| ENSG00000257923 | CUX1        |
| ENSG00000238227 | TMEM250     |
| ENSG00000160796 | NBEAL2      |
| ENSG00000160325 | CACFD1      |
| ENSG00000125753 | VASP        |
| ENSG00000178386 | ZNF223      |
| ENSG00000125834 | STK35       |
| ENSG00000167657 | DAPK3       |
| ENSG00000163872 | YEATS2      |
| ENSG00000097007 | ABL1        |
| ENSG00000102804 | TSC22D1     |
| ENSG00000175220 | ARHGAP1     |
| ENSG00000159840 | ZYX         |
| ENSG00000075240 | GRAMD4      |

| <b>ENSG</b>     | <b>NAME</b> |
|-----------------|-------------|
| ENSG00000173153 | ESRRA       |
| ENSG00000099956 | SMARCB1     |
| ENSG00000197081 | IGF2R       |
| ENSG00000130787 | HIP1R       |
| ENSG00000110697 | PITPNM1     |
| ENSG00000072274 | TFRC        |
| ENSG00000041982 | TNC         |
| ENSG00000188818 | ZDHHC11     |
| ENSG00000185467 | KPNA7       |
| ENSG00000188566 | NDOR1       |
| ENSG00000162645 | GBP2        |
| ENSG00000182218 | HHIPL1      |
| ENSG00000034510 | TMSB10      |
| ENSG00000112137 | PHACTR1     |
| ENSG00000100401 | RANGAP1     |
| ENSG00000015475 | BID         |
| ENSG00000159399 | HK2         |
| ENSG00000070010 | UFD1        |
| ENSG00000006459 | KDM7A       |
| ENSG00000072401 | UBE2D1      |
| ENSG00000119682 | AREL1       |
| ENSG00000141959 | PFKL        |
| ENSG00000103042 | SLC38A7     |
| ENSG00000089639 | GMIP        |
| ENSG00000145979 | TBC1D7      |
| ENSG00000176619 | LMNB2       |
| ENSG00000114554 | PLXNA1      |
| ENSG00000106348 | IMPDH1      |

| <b>ENSG</b>     | <b>NAME</b>     |
|-----------------|-----------------|
| ENSG00000160305 | DIP2A           |
| ENSG00000095951 | HIVEP1          |
| ENSG00000183255 | PTTG1P          |
| ENSG00000008083 | JARID2          |
| ENSG00000170340 | B3GNT2          |
| ENSG00000128298 | BAIAP2L2        |
| ENSG00000067955 | CBFB            |
| ENSG00000160877 | NACC1           |
| ENSG00000103335 | PIEZO1          |
| ENSG00000089159 | PXN             |
| ENSG00000271303 | SRXN1           |
| ENSG00000167173 | C15orf39        |
| ENSG00000158470 | B4GALT5         |
| ENSG00000160271 | RALGDS<br>RP11- |
| ENSG00000241962 | 111H13.1        |
| ENSG00000173214 | MFSD4B          |
| ENSG00000198373 | WWP2            |
| ENSG00000074181 | NOTCH3          |
| ENSG00000167378 | IRGQ            |
| ENSG00000197136 | PCNX3           |
| ENSG00000106683 | LIMK1           |
| ENSG00000136378 | ADAMTS7         |
| ENSG00000104142 | VPS18           |
| ENSG00000160310 | PRMT2           |
| ENSG00000137094 | DNAJB5          |
| ENSG00000278662 | GOLGA6L10       |
| ENSG00000164047 | CAMP            |
| ENSG00000105281 | SLC1A5          |

| <b>ENSG</b>     | <b>NAME</b> |
|-----------------|-------------|
| ENSG00000099814 | CEP170B     |
| ENSG00000065457 | ADAT1       |
| ENSG00000088038 | CNOT3       |
| ENSG00000137166 | FOXP4       |
| ENSG00000090372 | STRN4       |
| ENSG00000119139 | TJP2        |
| ENSG00000160285 | LSS         |
| ENSG00000130347 | RTN4IP1     |
| ENSG00000184792 | OSBP2       |
| ENSG00000100156 | SLC16A8     |
| ENSG00000101294 | HM13        |
| ENSG00000123130 | ACOT9       |
| ENSG00000135048 | CEMIP2      |
| ENSG00000205336 | ADGRG1      |
| ENSG00000164054 | SHISA5      |
| ENSG00000130706 | ADRM1       |
| ENSG00000103111 | MON1B       |
| ENSG00000203883 | SOX18       |
| ENSG00000186716 | BCR         |
| ENSG00000129566 | TEP1        |
| ENSG00000141985 | SH3GL1      |
| ENSG00000118960 | HS1BP3      |
| ENSG00000198752 | CDC42BPB    |
| ENSG00000171443 | ZNF524      |
| ENSG00000139209 | SLC38A4     |
| ENSG00000196588 | MRTFA       |
| ENSG00000116871 | MAP7D1      |
| ENSG00000146535 | GNA12       |

| <b>ENSG</b>     | <b>NAME</b> |
|-----------------|-------------|
| ENSG00000157593 | SLC35B2     |
| ENSG00000152558 | TMEM123     |
| ENSG00000105063 | PPP6R1      |
| ENSG00000175463 | TBC1D10C    |
| ENSG00000163812 | ZDHHC3      |
| ENSG00000188157 | AGRN        |
| ENSG00000134882 | UBAC2       |
| ENSG00000139793 | MBNL2       |
| ENSG00000187605 | TET3        |
| ENSG00000050820 | BCAR1       |
| ENSG00000119408 | NEK6        |
| ENSG00000172757 | CFL1        |
| ENSG00000242802 | AP5Z1       |
| ENSG00000159720 | ATP6V0D1    |
| ENSG00000138835 | RGS3        |
| ENSG00000149743 | TRPT1       |
| ENSG00000205250 | E2F4        |
| ENSG00000101084 | RAB5IF      |
| ENSG00000103035 | PSMD7       |
| ENSG00000142208 | AKT1        |
| ENSG00000103043 | VAC14       |
| ENSG00000179820 | MYADM       |
| ENSG00000135587 | SMPD2       |
| ENSG00000142409 | ZNF787      |
| ENSG00000160218 | TRAPPC10    |
| ENSG00000167491 | GATAD2A     |
| ENSG00000148334 | PTGES2      |
| ENSG00000107438 | PDLIM1      |
| ENSG00000182154 | MRPL41      |

| <b>ENSG</b>     | <b>NAME</b> |
|-----------------|-------------|
| ENSG00000215193 | PEX26       |
| ENSG00000136026 | CKAP4       |
| ENSG00000174177 | CTU2        |
| ENSG00000124788 | ATXN1       |
| ENSG00000123989 | CHPF        |
| ENSG00000163170 | BOLA3       |
| ENSG00000135636 | DYSF        |
| ENSG00000007866 | TEAD3       |
| ENSG00000132970 | WASF3       |
| ENSG00000115216 | NRBP1       |
| ENSG00000198113 | TOR4A       |
| ENSG00000104853 | CLPTM1      |
| ENSG00000188986 | NELFB       |
| ENSG00000198324 | PHETA1      |
| ENSG00000128283 | CDC42EP1    |
| ENSG00000075539 | FRYL        |
| ENSG00000160999 | SH2B2       |
| ENSG00000181830 | SLC35C1     |
| ENSG00000125970 | RALY        |
| ENSG00000130559 | CAMSAP1     |
| ENSG00000105287 | PRKD2       |
| ENSG00000179055 | OR13D1      |
| ENSG00000198517 | MAFK        |
| ENSG00000158526 | TSR2        |
| ENSG00000087086 | FTL         |
| ENSG00000143867 | OSR1        |
| ENSG00000174946 | GPR171      |
| ENSG00000172575 | RASGRP1     |
| ENSG00000186496 | ZNF396      |

| <b>ENSG</b>     | <b>NAME</b> |
|-----------------|-------------|
| ENSG00000042753 | AP2S1       |
| ENSG00000165689 | ENTR1       |
| ENSG00000099917 | MED15       |
| ENSG00000106868 | SUSD1       |
| ENSG00000241553 | ARPC4       |
| ENSG00000164880 | INTS1       |
| ENSG00000120254 | MTHFD1L     |
| ENSG00000182944 | EWSR1       |
| ENSG00000139908 | TSSK4       |
| ENSG00000221823 | PPP3R1      |
| ENSG00000205903 | ZNF316      |
| ENSG00000147697 | GSDMC       |
| ENSG00000128272 | ATF4        |
| ENSG00000148335 | NTMT1       |
| ENSG00000007080 | CCDC124     |
| ENSG00000138316 | ADAMTS14    |
| ENSG00000130749 | ZC3H4       |
| ENSG00000137267 | TUBB2A      |
| ENSG00000137266 | SLC22A23    |
| ENSG00000067829 | IDH3G       |
| ENSG00000135047 | CTSL        |
| ENSG00000028528 | SNX1        |
| ENSG00000173436 | MICOS10     |
| ENSG00000213614 | HEXA        |
| ENSG00000166295 | ANAPC16     |
| ENSG00000138303 | ASCC1       |
| ENSG00000139624 | CERS5       |
| ENSG00000126262 | FFAR2       |
| ENSG00000245680 | ZNF585B     |



| <b>ENSG</b>     | <b>NAME</b> |
|-----------------|-------------|
| ENSG00000100243 | CYB5R3      |
| ENSG00000180879 | SSR4        |
| ENSG00000110218 | PANX1       |
| ENSG00000158859 | ADAMTS4     |
| ENSG00000172216 | CEBPB       |
| ENSG00000106268 | NUDT1       |
| ENSG00000101199 | ARFGAP1     |
| ENSG00000130309 | COLGALT1    |
| ENSG00000080189 | SLC35C2     |
| ENSG00000018280 | SLC11A1     |
| ENSG00000262919 | CCNQ        |
| ENSG00000164818 | DNAAF5      |
| ENSG00000214160 | ALG3        |
| ENSG00000127914 | AKAP9       |
| ENSG00000164535 | DAGLB       |
| ENSG00000099256 | PRTFDC1     |
| ENSG00000165271 | NOL6        |
| ENSG00000185825 | BCAP31      |
| ENSG00000163931 | TKT         |
| ENSG00000196865 | NHLRC2      |
| ENSG00000075624 | ACTB        |
| ENSG00000142669 | SH3BGRL3    |
| ENSG00000106263 | EIF3B       |
| ENSG00000146833 | TRIM4       |
| ENSG00000161011 | SQSTM1      |
| ENSG00000204843 | DCTN1       |
| ENSG00000095574 | IKZF5       |
| ENSG00000269858 | EGLN2       |

| <b>ENSG</b>     | <b>NAME</b>                |
|-----------------|----------------------------|
| ENSG00000135164 | DMTF1                      |
| ENSG00000232593 | KANTR                      |
| ENSG00000007001 | UPP2                       |
| ENSG00000032219 | ARID4A<br>RP11-<br>244H3.5 |
| ENSG00000284773 | RFC1                       |
| ENSG00000035928 | SIRT1                      |
| ENSG00000096717 | GPKOW                      |
| ENSG00000068394 | LHX4                       |
| ENSG00000121454 | ZNF181                     |
| ENSG00000197841 | TBC1D19                    |
| ENSG00000109680 | DCAF16                     |
| ENSG00000163257 | JADE1                      |
| ENSG00000077684 | ERVW-1                     |
| ENSG00000242950 | KIAA1328                   |
| ENSG00000150477 | BDNF                       |
| ENSG00000176697 | FAM228B                    |
| ENSG00000219626 | TSHR                       |
| ENSG00000165409 | HNRNPAB                    |
| ENSG00000197451 | GLIPR1L2                   |
| ENSG00000180481 | MPC2                       |
| ENSG00000143158 | ATF1                       |
| ENSG00000123268 | PIK3R1                     |
| ENSG00000145675 | ZNF425                     |
| ENSG00000204947 | DNAJB12                    |
| ENSG00000148719 | ANKHD1                     |
| ENSG00000131503 | TNFRSF14                   |
| ENSG00000157873 | ACBD6                      |
| ENSG00000230124 |                            |

| <b>ENSG</b>     | <b>NAME</b> |
|-----------------|-------------|
| ENSG00000184677 | ZBTB40      |
| ENSG00000065526 | SPEN        |
| ENSG00000175536 | LIPT2       |
| ENSG00000172888 | ZNF621      |
| ENSG00000090905 | TNRC6A      |
| ENSG00000111785 | RIC8B       |
| ENSG00000167216 | KATNAL2     |
| ENSG00000168297 | PXK         |
| ENSG00000183549 | ACSM5       |
| ENSG00000128881 | TTBK2       |
| ENSG00000139651 | ZNF740      |
| ENSG00000181873 | IBA57       |
| ENSG00000113593 | PPWD1       |
| ENSG00000139597 | N4BP2L1     |
| ENSG00000138380 | CARF        |
| ENSG00000204130 | RUFY2       |
| ENSG00000037637 | FBXO42      |
| ENSG00000157259 | GATAD1      |
| ENSG00000180011 | ZADH2       |
| ENSG00000165879 | FRAT1       |
| ENSG00000166275 | BORCS7      |
| ENSG00000151687 | ANKAR       |
| ENSG00000122299 | ZC3H7A      |
| ENSG00000188542 | DUSP28      |
| ENSG00000139899 | CBLN3       |
| ENSG00000089847 | ANKRD24     |
| ENSG00000165923 | AGBL2       |
| ENSG00000217930 | PAM16       |

| <b>ENSG</b>     | <b>NAME</b> |
|-----------------|-------------|
| ENSG00000166377 | ATP9B       |
| ENSG00000176055 | MBLAC2      |
| ENSG00000116539 | ASH1L       |
| ENSG00000050426 | LETMD1      |
| ENSG00000214413 | BBIP1       |
| ENSG00000110888 | CAPRN2      |
| ENSG00000106804 | C5          |
| ENSG00000178498 | DTX3        |
| ENSG00000118579 | MED28       |
| ENSG00000019995 | ZRANB1      |
| ENSG00000156521 | TYSND1      |
| ENSG00000134480 | CCNH        |
| ENSG00000188916 | INSYN2A     |
| ENSG00000145868 | FBXO38      |
| ENSG00000171817 | ZNF540      |
| ENSG00000152217 | SETBP1      |
| ENSG00000126091 | ST3GAL3     |
| ENSG00000143951 | WDPCP       |
| ENSG00000047188 | YTHDC2      |
| ENSG00000132275 | RRP8        |
| ENSG00000107829 | FBXW4       |
| ENSG00000184083 | FAM120C     |
| ENSG00000185129 | PURA        |
| ENSG00000135314 | KHDC1       |
| ENSG00000089280 | FUS         |
| ENSG00000156398 | SFXN2       |
| ENSG00000111269 | CREBL2      |
| ENSG00000163935 | SFMBT1      |
| ENSG00000158987 | RAPGEF6     |

| <b>ENSG</b>     | <b>NAME</b> |
|-----------------|-------------|
| ENSG00000165102 | HGSNAT      |
| ENSG00000118298 | CA14        |
| ENSG00000107672 | NSMCE4A     |
| ENSG00000153237 | CCDC148     |
| ENSG00000165406 | MARCHF8     |
| ENSG00000159023 | EPB41       |
| ENSG00000094880 | CDC23       |
| ENSG00000179981 | TSHZ1       |
| ENSG00000095539 | SEMA4G      |
| ENSG00000164296 | TIGD6       |
| ENSG00000170445 | HARS1       |
| ENSG00000055147 | FAM114A2    |
| ENSG00000145833 | DDX46       |
| ENSG00000151276 | MAGI1       |
| ENSG00000132196 | HSD17B7     |
| ENSG00000121897 | LIAS        |
| ENSG00000153922 | CHD1        |
| ENSG00000139714 | MORN3       |
| ENSG00000163001 | CFAP36      |
| ENSG00000101353 | MROH8       |
| ENSG00000152240 | HAUS1       |
| ENSG00000188177 | ZC3H6       |
| ENSG00000099290 | WASHC2A     |
| ENSG00000155016 | CYP2U1      |
| ENSG00000109790 | KLHL5       |
| ENSG00000135469 | COQ10A      |
| ENSG00000143337 | TOR1AIP1    |
| ENSG00000163596 | ICA1L       |
| ENSG00000143994 | ABHD1       |

| <b>ENSG</b>     | <b>NAME</b> |
|-----------------|-------------|
| ENSG00000165868 | HSPA12A     |
| ENSG00000164331 | ANKRA2      |
| ENSG00000081059 | TCF7        |
| ENSG00000120333 | MRPS14      |
| ENSG00000197343 | ZNF655      |
| ENSG00000121851 | POLR3GL     |
| ENSG00000168944 | CEP120      |
| ENSG00000108021 | TASOR2      |
| ENSG00000170915 | PAQR8       |
| ENSG00000141646 | SMAD4       |
| ENSG00000133121 | STARD13     |
| ENSG00000105948 | TTC26       |
| ENSG00000105429 | MEGF8       |
| ENSG00000147548 | NSD3        |
| ENSG00000175395 | ZNF25       |
| ENSG00000113621 | TXNDC15     |
| ENSG00000198961 | PJA2        |
| ENSG00000090686 | USP48       |
| ENSG00000113595 | TRIM23      |
| ENSG00000143515 | ATP8B2      |
| ENSG00000162623 | TYW3        |
| ENSG00000033011 | ALG1        |
| ENSG00000157796 | WDR19       |
| ENSG00000215912 | TTC34       |
| ENSG00000120733 | KDM3B       |
| ENSG00000103510 | KAT8        |
| ENSG00000168778 | TCTN2       |
| ENSG00000204172 | AGAP9       |
| ENSG00000086589 | RBM22       |

| <b>ENSG</b>     | <b>NAME</b> |
|-----------------|-------------|
| ENSG00000170234 | PWWP2A      |
| ENSG00000103351 | CLUAP1      |
| ENSG00000134759 | ELP2        |
| ENSG00000106479 | ZNF862      |
| ENSG00000162444 | RBP7        |
| ENSG00000186687 | LYRM7       |
| ENSG00000118777 | ABCG2       |
| ENSG00000146007 | ZMAT2       |
| ENSG00000135622 | SEMA4F      |
| ENSG00000081791 | DELE1       |
| ENSG00000103544 | VPS35L      |
| ENSG00000157343 | ARMC12      |
| ENSG00000176783 | RUFY1       |
| ENSG00000075407 | ZNF37A      |
| ENSG00000166436 | TRIM66      |
| ENSG00000166313 | APBB1       |
| ENSG00000113318 | MSH3        |
| ENSG00000044459 | CNTLN       |
| ENSG00000185875 | THNSL1      |
| ENSG00000041880 | PARP3       |
| ENSG00000122008 | POLK        |
| ENSG00000132570 | PCBD2       |
| ENSG00000101773 | RBBP8       |
| ENSG00000182700 | IGIP        |
| ENSG00000096872 | IFT74       |
| ENSG00000204219 | TCEA3       |
| ENSG00000109618 | SEPSECS     |
| ENSG00000197776 | KLHDC1      |
| ENSG00000131437 | KIF3A       |

| <b>ENSG</b>     | <b>NAME</b> |
|-----------------|-------------|
| ENSG00000121486 | TRMT1L      |
| ENSG00000174944 | P2RY14      |
| ENSG00000107018 | RLN1        |
| ENSG00000184271 | POU6F1      |
| ENSG00000103174 | NAGPA       |
| ENSG00000141642 | ELAC1       |
| ENSG00000120049 | KCNIP2      |
| ENSG00000142082 | SIRT3       |
| ENSG00000113108 | APBB3       |
| ENSG00000001461 | NIPAL3      |
| ENSG00000237190 | CDKN2AIPNL  |
| ENSG00000164615 | CAMLG       |
| ENSG00000144893 | MED12L      |
| ENSG00000181631 | P2RY13      |
| ENSG00000196632 | WNK3        |
| ENSG00000170430 | MGMT        |
| ENSG00000104205 | SGK3        |
| ENSG00000059588 | TARBP1      |
| ENSG00000170099 | SERPINA6    |
| ENSG00000154309 | DISP1       |
| ENSG00000163749 | CCDC158     |
| ENSG00000131507 | NDFIP1      |
| ENSG00000144040 | SFXN5       |
| ENSG00000174885 | NLRP6       |
| ENSG00000139351 | SYCP3       |
| ENSG00000118276 | B4GALT6     |
| ENSG00000113141 | IK          |
| ENSG00000043143 | JADE2       |
| ENSG00000121753 | ADGRB2      |

| <b>ENSG</b>     | <b>NAME</b>  |
|-----------------|--------------|
| ENSG00000138175 | ARL3         |
| ENSG00000115318 | LOXL3        |
| ENSG00000188672 | RHCE         |
| ENSG00000172197 | MBOAT1       |
| ENSG00000105227 | PRX          |
| ENSG00000168765 | GSTM4        |
| ENSG00000158062 | UBXN11       |
| ENSG00000120915 | EPHX2        |
| ENSG00000063854 | HAGH         |
| ENSG00000258818 | RNASE4       |
| ENSG00000169313 | P2RY12       |
| ENSG00000176723 | ZNF843       |
| ENSG00000167972 | ABCA3        |
| ENSG00000109758 | HGFAC        |
| ENSG00000187240 | DYNC2H1      |
| ENSG00000049769 | PPP1R3F      |
| ENSG00000111666 | CHPT1        |
| ENSG00000285868 | CTB-109A12.2 |
| ENSG00000150593 | PDCD4        |
| ENSG00000152086 | TUBA3E       |
| ENSG00000134352 | IL6ST        |
| ENSG00000112874 | NUDT12       |
| ENSG00000036448 | MYOM2        |
| ENSG00000145743 | FBXL17       |
| ENSG00000070081 | NUCB2        |
| ENSG00000171160 | MORN4        |
| ENSG00000155850 | SLC26A2      |
| ENSG00000173258 | ZNF483       |
| ENSG00000171174 | RBKS         |

| <b>ENSG</b>     | <b>NAME</b> |
|-----------------|-------------|
| ENSG00000174788 | PCP2        |
| ENSG00000145476 | CYP4V2      |
| ENSG00000237489 | C10orf143   |
| ENSG00000172661 | WASHC2C     |
| ENSG00000133706 | LARS1       |
| ENSG00000103540 | CCP110      |
| ENSG00000115325 | DOK1        |
| ENSG00000144649 | GASK1A      |
| ENSG00000105707 | HPN         |
| ENSG00000159307 | SCUBE1      |
| ENSG00000196177 | ACADSB      |
| ENSG00000157303 | SUSD3       |
| ENSG00000145882 | PCYOX1L     |
| ENSG00000150627 | WDR17       |
| ENSG00000164241 | C5orf63     |
| ENSG00000158301 | GPRASP2     |
| ENSG00000137821 | LRRC49      |
| ENSG00000171385 | KCND3       |
| ENSG00000239887 | C1orf226    |
| ENSG00000241935 | HOGA1       |
| ENSG00000055163 | CYFIP2      |
| ENSG00000010438 | PRSS3       |
| ENSG00000125510 | OPRL1       |
| ENSG00000180999 | C1orf105    |
| ENSG00000213366 | GSTM2       |
| ENSG00000063180 | CA11        |
| ENSG00000162104 | ADCY9       |

| <b>ENSG</b>     | <b>NAME</b> |
|-----------------|-------------|
| ENSG00000129028 | THAP10      |
| ENSG00000140093 | SERPINA10   |
| ENSG00000145375 | SPATA5      |
| ENSG00000204314 | PRRT1       |
| ENSG00000136059 | VILL        |
| ENSG00000183066 | WBP2NL      |
| ENSG00000163491 | NEK10       |
| ENSG00000140443 | IGF1R       |
| ENSG00000132563 | REEP2       |
| ENSG00000159374 | M1AP        |
| ENSG00000269190 | FBXO17      |
| ENSG00000143375 | CGN         |
| ENSG00000158813 | EDA         |
| ENSG00000204116 | CHIC1       |
| ENSG00000102043 | MTMR8       |
| ENSG00000179902 | C1orf194    |
| ENSG00000159445 | THEM4       |
| ENSG00000120729 | MYOT        |
| ENSG00000244274 | DBNDD2      |
| ENSG00000167371 | PRRT2       |
| ENSG00000164742 | ADCY1       |
| ENSG00000128596 | CCDC136     |
| ENSG00000206181 | ELOA2       |
| ENSG00000182950 | ODF3L1      |
| ENSG00000198929 | NOS1AP      |
| ENSG00000088543 | C3orf18     |
| ENSG00000135423 | GLS2        |

| <b>ENSG</b>     | <b>NAME</b>     |
|-----------------|-----------------|
| ENSG00000172671 | ZFAND4<br>RP11- |
| ENSG00000273291 | 136C24.3        |
| ENSG00000197375 | SLC22A5         |
| ENSG00000123066 | MED13L<br>CTD-  |
| ENSG00000285043 | 2515O10.6       |
| ENSG00000149050 | ZNF214          |
| ENSG00000163040 | CCDC74A         |
| ENSG00000082175 | PGR             |
| ENSG00000159208 | CIART           |
| ENSG00000115112 | TFCP2L1         |
| ENSG00000151892 | GFRA1           |
| ENSG00000171791 | BCL2            |
| ENSG00000185739 | SRL             |
| ENSG00000116031 | CD207           |
| ENSG00000168329 | CX3CR1          |
| ENSG00000165953 | SERPINA12       |
| ENSG00000160460 | SPTBN4          |
| ENSG00000171722 | SPATA46         |
| ENSG00000183833 | CFAP91          |
| ENSG00000101098 | RIMS4           |
| ENSG00000240204 | SMKR1           |
| ENSG00000171435 | KSR2            |
| ENSG00000112981 | NME5            |
| ENSG00000116661 | FBXO2           |
| ENSG00000162571 | TTLL10          |
| ENSG00000152076 | CCDC74B         |
| ENSG00000120262 | CCDC170         |

| <b>ENSG</b>     | <b>NAME</b> |
|-----------------|-------------|
| ENSG00000124194 | GDAP1L1     |
| ENSG00000132554 | RGS22       |
| ENSG00000174080 | CTSF        |
| ENSG00000205978 | NYNRIN      |
| ENSG00000147576 | ADHFE1      |
| ENSG00000261678 | SCRT1       |
| ENSG00000154153 | RETREG1     |
| ENSG00000170917 | NUDT6       |
| ENSG00000178150 | ZNF114      |
| ENSG00000124171 | PARD6B      |
| ENSG00000128536 | CDHR3       |

| <b>ENSG</b>     | <b>NAME</b>  |
|-----------------|--------------|
| ENSG00000221989 | OR2A2        |
| ENSG00000214944 | ARHGEF28     |
| ENSG00000146054 | TRIM7        |
| ENSG00000203942 | C10orf62     |
| ENSG00000133256 | PDE6B        |
| ENSG00000196372 | ASB13        |
| ENSG00000267385 | CTB-50L17.14 |
| ENSG00000134533 | RERG         |
| ENSG00000164128 | NPY1R        |
| ENSG00000170500 | LONRF2       |
| ENSG00000066468 | FGFR2        |

| <b>ENSG</b>     | <b>NAME</b> |
|-----------------|-------------|
| ENSG00000170893 | TRH         |
| ENSG00000124249 | KCNK15      |
| ENSG00000113739 | STC2        |
| ENSG00000206013 | IFITM5      |
| ENSG00000175356 | SCUBE2      |
| ENSG00000149927 | DOC2A       |
| ENSG00000091831 | ESR1        |

Supplementary Table 3: ERBB2 mutations in the RNAseq samples

| patient | cluster-nr | Consequence.HGVSp                                        | mutType | AA-Change          | domain |
|---------|------------|----------------------------------------------------------|---------|--------------------|--------|
| p1      | 3          | ENSP00000269571.4:p.D110E                                | SNV     | D110E              | ex     |
| p2      | 3          | ENSP00000269571.4:p.R190W                                | SNV     | R190W              | ex     |
| p3      | 3          | ENSP00000269571.4:p.D277Y                                | SNV     | D277Y              | ex     |
| p4      | 3          | ENSP00000269571.4:p.S310F                                | SNV     | S310F              | ex     |
| p5      | 3          | ENSP00000269571.4:p.S310F                                | SNV     | S310F              | ex     |
| p6      | 1          | ENSP00000269571.4:p.R678Q                                | SNV     | R678Q              | ex     |
| p7      | 1          | ENSP00000269571.4:p.L755S                                | SNV     | L755S              | TK     |
| p8      | 3          | ENSP00000269571.4:p.L755S                                | SNV     | L755S              | TK     |
| p9      | 3          | ENSP00000269571.4:p.V777L                                | SNV     | V777L              | TK     |
| p10     | 3          | ENSP00000269571.4:p.V777L                                | SNV     | V777L              | TK     |
| p11     | 3          | ENSP00000269571.4:p.-780_-781insGSP                      | InDel   | 780_-<br>781insGSP | TK     |
| p12     | 3          | ENSP00000269571.4:p.I788F                                | SNV     | I788F              | TK     |
| p13     | 3          | ENSP00000269571.4:p.E876K                                | SNV     | E876K              | TK     |
| p14     | 3          | ENSP00000269571.4:p.M955I                                | SNV     | M955I              | TK     |
| p15     | 3          | ENSP00000269571.4:p.P983S                                | SNV     | P983S              | TK     |
| p16     | 3          | ENSP00000269571.4:p.E717D,<br>ENSP00000269571.4:p.L755S  | SNV     | E717D, L755S       | Ex/TK  |
| p17     | 3          | ENSP00000269571.4:p.L755S,<br>ENSP00000269571.4:p.T862A  | SNV     | L755S, T862A       | TK     |
| p18     | 3          | ENSP00000269571.4:p.D769Y,<br>ENSP00000269571.4:p.E1114K | SNV     | D769Y,<br>E1114K   | TK     |

*ex: extracellular, TK: Tyrosine Kinase*

Supplementary Table 4: IPA-Upstream Regulators using genes Suppl. Table 1

| <b>Upstream Regulator</b> | <b>Molecule Type</b>    | <b>Predicted Activation State</b> | <b>Activation z-score</b> | <b>p-value of overlap</b> | <b>Target Molecules in Dataset</b>                                                                                                                                                                                                                                                                                                                                                         |
|---------------------------|-------------------------|-----------------------------------|---------------------------|---------------------------|--------------------------------------------------------------------------------------------------------------------------------------------------------------------------------------------------------------------------------------------------------------------------------------------------------------------------------------------------------------------------------------------|
| ERBB2                     | kinase                  | Activated                         | 2.339                     | 2.65E-05                  | ABCG2,ABL1,ABRACL,ACTB,AKT1,ATF4,BCL2,BCL3,CDC23,CDC42BPG,CEBPB,CX3CR1,DOK1,DUSP6,E2F3,EPHX2,ESR1,FFAR2,GALNT3,HES1,HES2,HGSNAT,HM13,IGF1R,IGF2R,IL6ST,ITGB6,KRT7,KRT81,LAD1,LMO4,LPAR2,LSS,MUCL1,MYCN,MYO10,NAGPA,NOTCH3,NPY1R,NRBP1,NUCB2,OPRL1,P2RY12,P2RY13,PDCD4,PHLDA2,PLAUR,POLK,POLR3GL,PRSS3,PTTG1IP,RETREG1,S100P,SDC1,SLC22A5,SMTN,SOX4,SPDEF,SYCP3,TGFBR1,TMEM132A,TNC,TSC22D1 |
| RAF1                      | kinase                  | Activated                         | 2.931                     | 9.57E-05                  | BCL2,CD37,CDC42EP1,CTSL,DUSP4,DUSP6,ESR1,HNRNPAB,IGF1R,LAD1,MGLL,NQO1,PHLDA2,PLAUR,PPP1R10,PRSS3,SDC1,SLC26A2,TSC22D1,TUBB2A                                                                                                                                                                                                                                                               |
| ERG                       | transcription regulator | Activated                         | 2.138                     | 0.000156                  | ABCC4,ADGRG1,ARMC12,BCR,CDC42BPB,COLGALT1,DBN1,DIP2A,IGF1R,MAGI1,MAP3K5,MYCN,MYO10,PLAUR,PXN,RGS3,RRAS,SOX4,SREBF2,WASF3                                                                                                                                                                                                                                                                   |
| NRG1                      | growth factor           | Activated                         | 2.154                     | 0.000701                  | ARPC4,ATF1,ATF4,BCL2,BDNF,CDC42EP1,DUSP4,DUSP6,HES1,HK2,INSL3,LMO4,MARCKS,MGLL,MNX1,PDCD4,PGR,PLAUR,PXN,SOX4,TGFR1                                                                                                                                                                                                                                                                         |
| EGF                       | growth factor           | Activated                         | 2.563                     | 0.000944                  | ABCG2,AKT1,B4GALT5,BCL2,CCL17,CDC42EP1,CEBPB,DGKD,DNMT3B,DUSP4,DUSP6,E2F3,ESR1,EZR,FAM89B,HES1,IGF1R,INSL3,MAP3K5,MNX1,MYCN,PDCD4,PGR,PHLDA2,PIK3R1,PLAUR,S100A9,SDC1,SLC37A1,SOX4,SPRY4,ST3GAL3,SYCP3,TFCP2L1,TNC,TRH,TUBB3,ULK1,VASP                                                                                                                                                     |
| TP73                      | transcription regulator | Activated                         | 2.231                     | 0.000953                  | AFAP1,ARVCF,BCAR1,BCL2,BID,CAMLG,DMTF1,EDA,FGFR2,G6PD,GLS2,GRAMD4,GTSE1,HAGH,HES1,HIVEP1,IGF1R,IGSF3,KCNK1,KLF5,LIMK1,MGMT,MYCN,NOTCH3,SHISA5,SPTBN4,TFCP2L1,TP53AIP1,TP53I11,UBE2D1,ULK1,WNK3                                                                                                                                                                                             |
